# Supplementary material for: Temporal changes in the radiocesium distribution in forests over the five years after the Fukushima Daiichi Nuclear Power Plant accident
Source: PubMed Central journal article supplement (PMC5557944; doi:10.1038/s41598-017-08261-x), 2017-08-15
Supplement: 41598_2017_8261_MOESM1_ESM.pdf [file 41598_2017_8261_MOESM1_ESM.pdf]

# **Temporal changes in the radiocesium distribution in forests over the five years after the Fukushima Daiichi Nuclear Power Plant accident**

Naohiro Imamura, Masabumi Komatsu, Shinta Ohashi, Shoji Hashimoto, Takuya Kajimoto, Shinji Kaneko, Tsutomu Takano

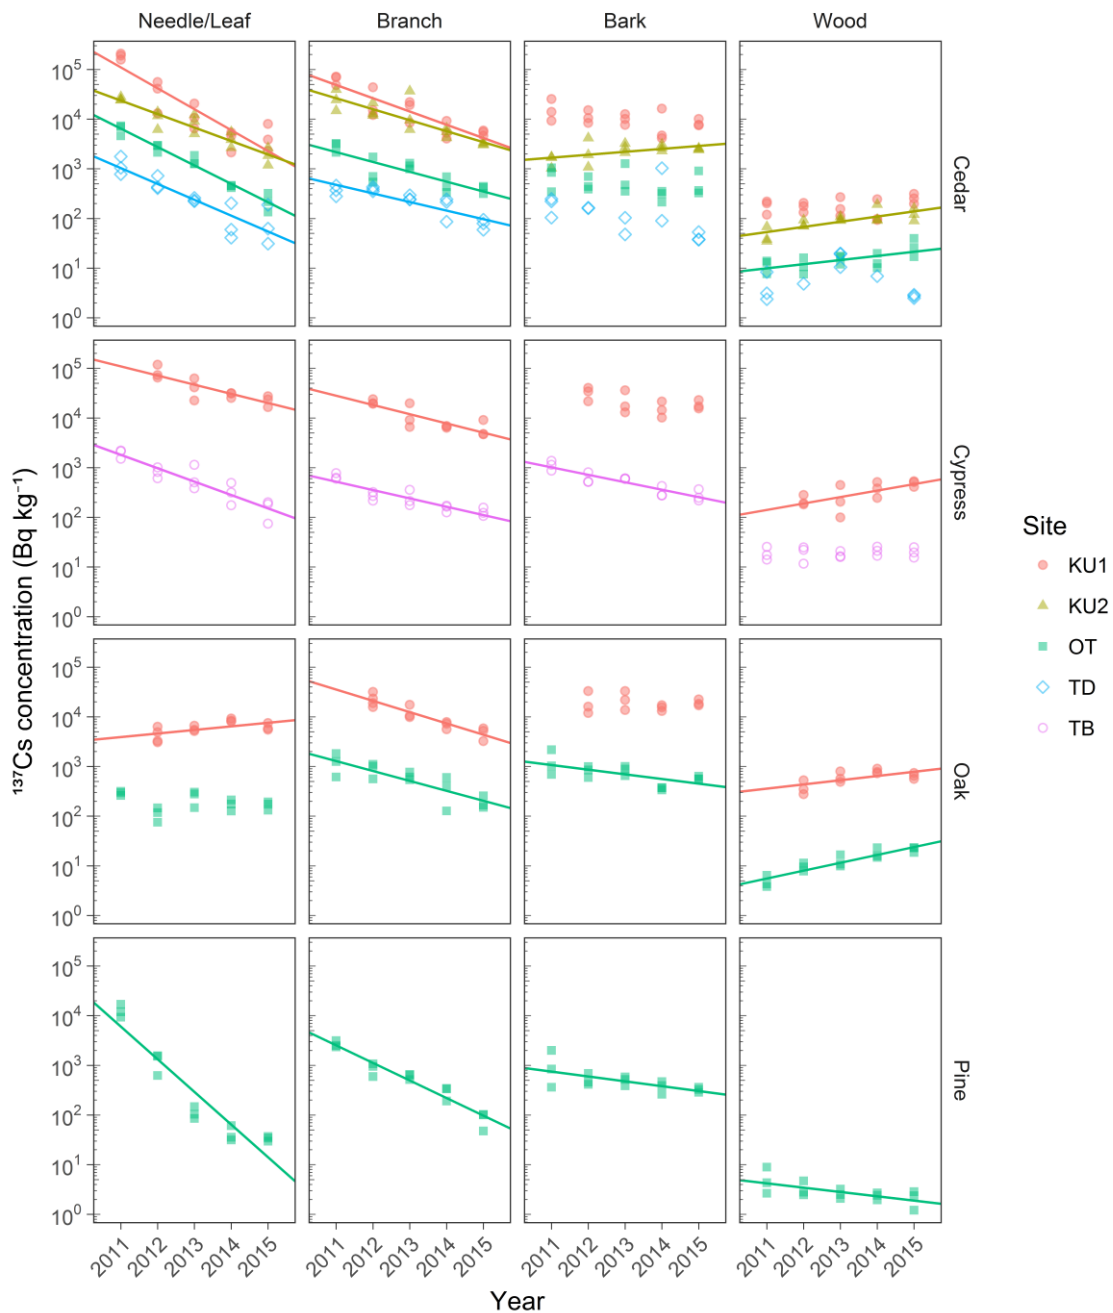

**Supplementary Figure S1. Time series of the needle/leaf, branch, bark, and wood  $^{137}\text{Cs}$  concentrations at each study plot.** For individual samples, log-transformed  $^{137}\text{Cs}$  concentrations above the detection limit were plotted against the sampling year. Maximum likelihood regression analysis was performed for data below the detection limit<sup>37</sup>. Significant trends between the log-transformed concentration and sampling year (linear regression analysis,  $p < 0.05$ ) are denoted by solid lines. The sampling period was August–September in each year except at KU2-S in 2011 (November 2011) and TB-H in 2011 and 2012 (February 2012 and February 2013, respectively). The radiocesium concentration was decay corrected to March 11, 2011.

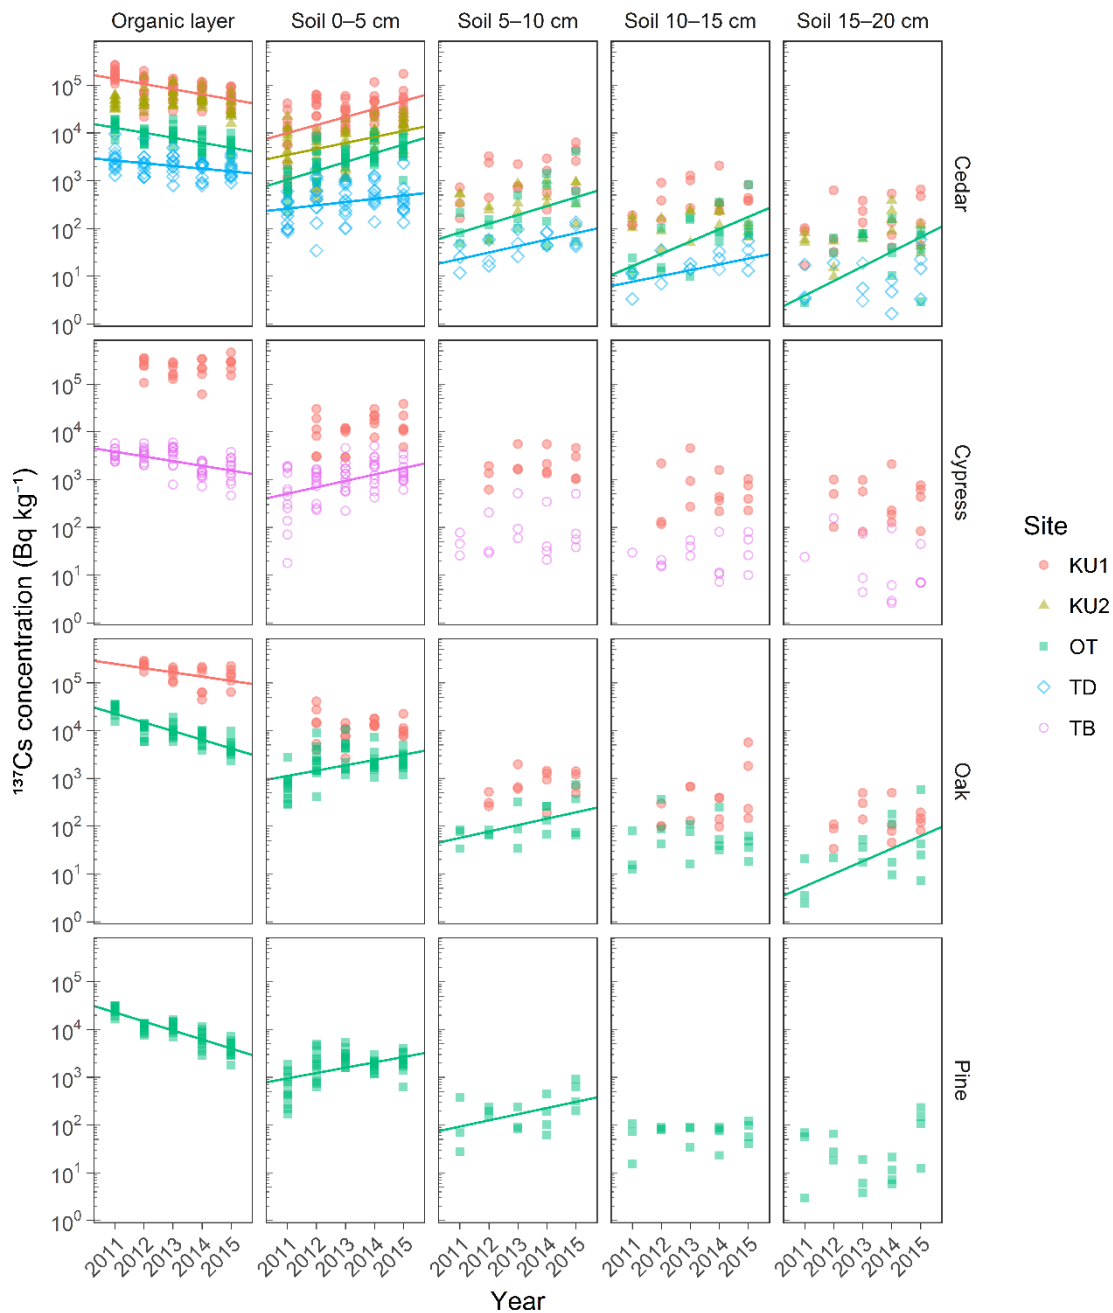

**Supplementary Figure S2. Time series of the organic layer and mineral soil layer (0–5 cm, 5–10 cm, 10–15 cm, and 15–20 cm)  $^{137}\text{Cs}$  concentrations at each study plot.** For individual samples, log-transformed  $^{137}\text{Cs}$  concentrations above the detection limit were plotted against the sampling year. Maximum likelihood regression analysis was performed for data below the detection limit<sup>37</sup>. Significant trends between the log-transformed concentration and sampling year (linear regression analysis,  $p < 0.05$ ) are denoted by solid lines. The sampling period was August–September in each year except at KU2-S in 2011 (November 2011) and TB-H in 2011 and 2012 (February 2012 and February 2013, respectively). The radiocesium concentration was decay corrected to March 11, 2011.
